1 Conditional interactions in literature-curated protein interaction databases

2

3

4 R. Greg Stacey<sup>1,\*</sup>, Michael A. Skinnider<sup>1</sup>, Jenny H. L. Chik<sup>1</sup>, Leonard J. Foster<sup>1,2,\*</sup>

5

6

7 <sup>1</sup> Michael Smith Laboratories, University of British Columbia, Vancouver V6T 1Z4, Canada

8 <sup>2</sup> Department of Biochemistry, University of British Columbia, Vancouver V6T 1Z3, Canada

9

10

11 \* Corresponding authors

12 Email: [richard.greg.stacey@msl.ubc.ca](mailto:richard.greg.stacey@msl.ubc.ca), [foster@msl.ubc.ca](mailto:foster@msl.ubc.ca)

## 13 Abstract

14 Databases of literature-curated protein-protein interactions (PPIs) are often used to interpret high-  
15 throughput interactome mapping studies and estimate error rates. These databases combine  
16 interactions across thousands of published studies and experimental techniques. Because the  
17 tendency for two proteins to interact depends on the local conditions, this heterogeneity of conditions  
18 means that only a subset of database PPIs are interacting during any given experiment. A typical use  
19 of these databases as gold standards in interactome mapping projects, however, assumes that PPIs  
20 included in the database are indeed interacting under the experimental conditions of the study. Using  
21 raw data from 20 co-fractionation experiments and six published interactomes, we demonstrate that  
22 this assumption is often false, with up to 55% of purported gold standard interactions showing no  
23 evidence of interaction, on average. We identify a subset of CORUM database complexes that do  
24 show consistent evidence of interaction in co-fractionation studies, and we use this subset as gold  
25 standards to dramatically improve interactome mapping as judged by the number of predicted  
26 interactions at a given error rate. We recommend using this CORUM subset as the gold standard set  
27 in future co-fractionation studies. More generally, we recommend using the subset of literature-  
28 curated PPIs that are specific to experimental conditions whenever possible.  
29  
30  
31

## 32 Introduction

33 Proteins perform the majority of cellular functions necessary for life. Nearly all individual proteins are  
34 modular components of larger macromolecular structures, i.e. protein complexes, and the exact role  
35 of a protein within a cell is controlled by its interactions with co-complex members. Uncovering which  
36 proteins interact, i.e. the interactome, is therefore central to understanding the molecular mechanisms  
37 of life.  
38

39 This task is complicated by a combinatorial explosion, however: a proteome containing 20000  
40 proteins has nearly 200 million potential pairwise interactions and many more higher order  
41 complexes. High-throughput techniques that analyze thousands of proteins simultaneously with  
42 minimal bias offer a solution to this problem (1). For example, PCP-SILAC (protein correlation  
43 profiling–stable isotope labeling of amino acids in cell culture), a co-fractionation (CF) technique,  
44 separates protein complexes into fractions according to their size (rotational cross-section), and  
45 associates proteins whose amounts are correlated between fractions. As each fraction is analyzed  
46 with mass spectrometry, PCP-SILAC and other CF techniques can detect tens of thousands of  
47 interacting proteins (2–8). In order to separate signal from noise, it is common for high-throughput  
48 protein interactome studies to consult databases of known, unequivocal interactions (“gold  
49 standards”) (2,3,9,10). For example, co-fractionation studies often use gold standard interactions as  
50 training labels in a machine learning classifier (2,3,11). Gold standards are also used to define false  
51 positive/negative and true positive/negative interactions in order to calculate common statistics such  
52 as precision, recall, and sensitivity (5–7,11,12).  
53

54 Gold standard databases are assembled from different experiments and techniques, each with a  
55 unique set of biases. Since protein-protein interactions (PPIs) can be conditional and transient, single  
56 datasets, which are typically generated by a single technique, can disagree with gold standards. This  
57 variability partly reflects true biological differences. For example, the majority of *in vivo* yeast PPIs  
58 were observed to depend on environmental and chemical conditions (13). Some assays also impose  
59 technical biases that limit detectable PPIs, such as a bias of some high-throughput techniques toward  
60 highly expressed or well studied protein pairs, or a bias against PPIs involving transmembrane

61 proteins (12). Therefore, gold standard databases that include all interactions that can occur will fail to  
62 describe the subset of interactions that are either not occurring due to current experimental  
63 conditions, or that are unlikely to be detected due to technical limitations.

64  
65 Therefore, a distinction should be made between the large, curated compilations of interactions  
66 across many studies, and the gold standard sets used as a reference for a single dataset. Our own  
67 focus has been on interactome mapping using co-fractionation, so here we quantify the proportion of  
68 gold standard interactions that fail to display any evidence for interaction in 20 co-fractionation  
69 datasets. Using a conservative measure of protein interaction, we find that between 19 and 55% of  
70 gold standard PPIs display no evidence of interacting. Across co-fractionation experiments, there is  
71 evidence that a subset of literature-curated complexes consistently co-fractionates, suggesting this  
72 subset would be a more appropriate gold standard reference set. Indeed, the number of predicted  
73 interactions at a given stringency increases dramatically when using this subset as a gold standard  
74 set. We recommend using this subset as the gold standard reference in future co-fractionation studies  
75 and, more generally, using experiment- and condition-specific gold standards whenever possible.

76  
77

## 78 **Results**

### 79 **2.1 Discrepancies exist between gold standards and individual datasets**

80 Using the CORUM database of protein complexes (14), we first examined the degree to which  
81 literature-curated PPIs were unsupported by data from single co-fractionation datasets. Many  
82 database PPIs show clear evidence of interaction, as shown by their tendency to co-fractionate for  
83 the entire chromatogram (Fig 1A) or a portion of the chromatogram (Fig 1B). However, other protein  
84 pairs from within a single CORUM complex show little evidence of interaction in certain experiments.  
85 For example, two chaperone proteins, HSP-90a (UniProt ID P07900) and BiP (P11021) are known to  
86 interact as part of a larger chaperone multiprotein complex (15) (CORUM complex “HCF-1”), yet there  
87 is little evidence that the two proteins co-fractionate in our data (Fig 1C).

88  
89 More broadly, across 20 PCP-SILAC co-fractionation datasets, the majority of random protein pairs  
90 do not co-fractionate, as quantified by anti-correlated fractionation profiles, a conservative measure of  
91 which protein pairs are non-interacting (red, Fig 1D). While the majority of gold standard protein pairs  
92 have positively correlated co-fractionation profiles (black), 23% (34442/149477) are negatively  
93 correlated. All 20 datasets include a similar proportion of negatively correlated gold standard pairs (23  
94 +/- 5%, mean +/- st.d.). This pattern is similar when co-fractionation is measured with Euclidean  
95 distance, another standard measure (Fig 1E).

96  
97

98 **Fig 1. Not all CORUM gold standard interactions are supported by co-fractionation data.** A.  
99 Example gold standard pair with strong evidence for interaction. Q9NQP4 and E5RGS4, prefoldin  
100 complex. B. Example gold standard pair with evidence for interaction. Q14103 and O75534, PIN1-  
101 AUF1 complex. C. Example gold standard protein pair with little data-derived evidence for interaction.  
102 P11021 and P07900, HCF-1 complex. D. Histogram of Pearson correlation coefficients and E.  
103 Euclidean distance between every gold standard interaction in our co-fractionation data (20 datasets,  
104 grey; average, black). All other protein pairs in our data are shown, the vast majority of which are not  
105 interacting (red). Example pairs A, B, C are shown (arrows).

106  
107

108 While the full set of CORUM complexes is a widely used gold standard (6,7,9–11), there are many  
109 other literature-curated interaction databases. In addition to CORUM, we examined nine databases of  
110 protein interactions (16–24) and two subsets of CORUM used previously as gold standards (2,3).  
111 These range from databases that include interactions from high-throughput experiments to manually  
112 curated databases composed exclusively of low-throughput experiments. All had anti-correlated  
113 protein pairs in our co-fractionation datasets (Fig 2). As a baseline, 62% of all protein pairs, the large  
114 majority of which can be assumed to be non-interacting, were anti-correlated (Fig 2, red). The  
115 proportion of anti-correlated pairs in gold standard sets ranged from 55% (HPRD) to 19% (CORUM).  
116 Restricting gold standard PPIs to those supported by two or more publications limits but does not  
117 eliminate uncorrelated protein pairs (Supp. Fig 1). Therefore all interaction databases investigated  
118 here contain protein pairs that are not supported by our co-fractionation data, and comparisons to  
119 CORUM give a conservative estimate of the discrepancy between our data and interaction  
120 databases.

121  
122

123 **Fig 2. Protein pairs across many gold standard databases do not co-fractionate, as measured**  
124 **by anti-correlated co-fractionation profiles (Pearson correlation  $R < 0$ ).** Each point is one dataset.  
125 Horizontal lines show medians. Red: all non-gold standard protein pairs. Only non-redundant gold  
126 standard pairs were analyzed.

127  
128

## 129 **2.2 Discrepancies are consistent within and between high-throughput** 130 **techniques**

131 A certain level of discrepancy between raw co-fractionation profiles and interaction databases should  
132 be expected, as all experimental samples undergo some degradation owing to the constraints  
133 imposed by each assay. But do individual datasets differ randomly or systematically from interaction  
134 databases? For certain gold standard complexes we see a strong tendency for co-complex members  
135 to co-fractionate, and, conversely, a strong tendency for other complexes to fail to co-fractionate (Fig  
136 3A). Across 20 co-fractionation datasets, we made 39846 pairwise comparisons between  
137 fractionation profiles of cytoplasmic ribosomal proteins, and 17616 pairwise comparisons of proteins  
138 in the C complex spliceosome. The collection of ribosomal gold standard interactions are significantly  
139 better correlated than chance ( $R = 0.64$ , chance  $R = 0.48$ ,  $p = 0.005$ , permutation test; Fig 3B), while  
140 the collection of spliceosome gold standard interactions are significantly worse correlated ( $R = 0.27$ ,  
141  $p < 0.001$ ; Fig 3C). Calculating significance for all 1253 observed CORUM complexes (permutation test,  
142 Benjamini-Hochberg correction), 419/1253 correlate significantly higher than average, while 294/1253  
143 are significantly lower. This suggests that some gold standard complexes are enriched for interacting  
144 protein pairs, while others are enriched for non-interacting protein pairs, where non-interacting pairs  
145 likely represent interactions disrupted by the particular assay.

146

147 Other high-throughput techniques display consistent over- and under-enrichment of specific gold  
148 standard complexes. Figure 3D shows gold standard complexes that were consistently predicted in  
149 one of three high-throughput techniques - CF, affinity purification mass spectrometry (AP-MS), or  
150 yeast two-hybrid (Y2H) - and largely absent from the others. Eighty gold standard complexes were  
151 predicted ( $\geq 1$  interaction per complex) in 4/6 co-fractionation interactomes, while being predicted in  
152 no more than a single AP-MS or Y2H interactome (chance = 14 complexes,  $p = 0.005$ , bootstrap).  
153 Similarly, 61 gold standard complexes are predicted in at least 2/3 Y2H interactomes, while being  
154 predicted in at most one co-fractionation or AP-MS interactome ( $p < 0.001$ ). Only 22 AP-MS-specific  
155 complexes are selected in this way ( $p = 0.49$ ) possibly due to the low CORUM coverage of

156 interactome AP3 (25). Technique-specific consistency is also seen at the level of pairwise interactions  
157 (Fig 3E).

158  
159

160 **Fig 3. High-throughput techniques consistently recover some gold standard complexes and**  
161 **consistently fail to recover others.** A. Average internal, pairwise correlation for every quantified  
162 gold standard complex. Only gold standard complexes with at least two identified proteins in one of  
163 20 co-fractionation datasets are shown (1253/2652 CORUM complexes). Correlation values are  
164 pooled across the 20 co-fractionation datasets, and the number of internal, pairwise comparisons is  
165 given by marker size. The pattern expected by random chance is shown in red (95% CI). B.  
166 Connection matrix, cytoplasmic ribosome. Pairwise correlation values were averaged over 20  
167 datasets. C. C complex spliceosome. D. Technique-specific gold standard complexes. All gold  
168 standard complexes predicted by at least 2/3 of the published interactomes from a given technique  
169 (CF, AP, Y2H), and no more than 1 interactome from the other techniques. E. Connection matrices  
170 for the Chaperonin Containing TCP-1 complex (CCT), a gold standard complex, taken from the  
171 published interactomes. White: interacting protein pair. Black: non-interacting.

172  
173

174 In addition to being truly non-interacting, the absence of some gold standard complexes from  
175 published interactomes (Fig 3D) could result from low expression of interacting partners (rendering  
176 them difficult to quantify) or from none of the co-complex members being included as baits. To control  
177 for this, we additionally looked at the subset of gold standard complexes where at least one  
178 interaction could potentially be predicted in each study, as defined by having quantified proteins and  
179 baits (see Methods). The same pattern seen in Figure 3D persisted (Supp. Table 1), indicating that  
180 gold standard complexes seen by one method but not others cannot be explained by lack of co-  
181 expression or choice of bait, and therefore likely reflect the fact that the physical association of gold  
182 standard complexes is indeed conditionally dependent.

183  
184

185 We note that the conditional dependence of gold standard complexes is not limited to the type of  
186 high-throughput experiment (CF, AP-MS, or Y2H). For example, using co-fractionation data where  
187 proteins were fractionated using a variety of techniques (2) (Supp. Table 1), the 60S ribosome gold  
188 standard complex consistently co-fractionated via sucrose fractionation (Supp. Fig 2A) but  
189 consistently failed to co-fractionate via heparin dual ion exchange (Supp. Fig 2B).

190

### 191 **2.3 Universal gold standards improve interactome mapping**

192 If a subset of database PPIs consistently fails to resemble interacting proteins for a given assay,  
193 performance should improve when these PPIs are removed from the gold standard set. We confirmed  
194 this was the case. We generated co-fractionation-specific gold standard subsets by selecting those  
195 complexes that were significantly enriched for interactions in interactomes CF4, CF5, and CF6 (2–4).  
196 Evaluating significance at four p-value thresholds ( $p < 1, 10^{-2}, 10^{-6}, 10^{-10}$ ) produced four subsets of  
197 CORUM complexes that contain 302, 122, 95, and 80 complexes, respectively (Table 1). To avoid  
198 training and testing on the same data, we defined the co-fractionation-specific gold standard subsets  
199 using interactomes published by other groups (CF4, CF5, CF6), and these gold standard subsets  
200 were then used to predict interactomes using co-fractionation data generated by our group.

201

202 These co-fractionation-specific CORUM subsets correspond significantly to housekeeping protein  
203 complexes. Using the Gini coefficient, a measure of inequality, we calculated consistency of mRNA

204 expression (Fig 4A) (26) and protein expression (Fig 4B) (27) across tissues and cell types. As  
205 quantified by lower Gini coefficients, the expression levels of co-fractionation-specific complexes are  
206 significantly more consistent across tissues than other CORUM complexes (mRNA: Gini = 0.28 vs  
207 Gini = 0.40,  $p = 2.2 \times 10^{-16}$ , Welch two-sample t-test; protein: Gini = 0.40 vs Gini = 0.49,  $p = 2.2 \times 10^{-10}$ ).  
208 This agrees with an orthogonal analysis of a mouse co-fractionation dataset collected by our  
209 group, which analyzed protein co-fractionation across seven tissue types. Quantifying co-fractionation  
210 via Pearson correlation, 15 CORUM complexes were found to be housekeeping complexes, as  
211 defined by average pairwise correlation significantly greater than chance in all seven tissues ( $p <$   
212  $0.05$ , permutation test; Fig 4C). Of these 15 complexes, 8 overlap with the 122 co-fractionation-  
213 specific CORUM complexes, a significant overlap ( $p = 7.6 \times 10^{-8}$ , hypergeometric test; overlapping  
214 complexes marked by asterisk \* in Figure 4C).

215  
216

217 **Fig 4. Gold standard complexes consistently predicted by co-fractionation correspond to**  
218 **housekeeping complexes.** A. Consistency of mRNA expression levels across tissue types, Gini  
219 coefficient (26). B. Consistency of protein expression levels across tissue and cell types, Gini  
220 coefficient (27). C. Fifteen housekeeping CORUM complexes, defined by significant pairwise  
221 correlation between co-fractionation profiles in all seven tissues. The 8/15 complexes that overlap  
222 with the 122 complex subset of CORUM are marked by asterisks.

223  
224

225 Using gold standard subsets generated in this way drastically alters the predicted interactomes (Fig  
226 5). Controlling interactome quality via the ratio of true positives (TP) and false positives (FP),  
227 calculated as precision ( $TP/(TP + FP)$ ), well-chosen gold standard subsets increased the size of the  
228 predicted interactome by up to an order of magnitude over randomly-chosen subsets (Fig 5A-C).  
229 Since FPs are defined as inter-complex protein pairs, they grow with the square of the gold standard  
230 set size. TPs, intra-complex pairs, grow linearly. Therefore there is a tendency for precision estimates  
231 to increase artificially as the gold standard set shrinks. For this reason we compared all co-  
232 fractionation-specific subsets (Fig 5 black) to random subsets of the same size (red). Precision-recall  
233 curves, which visualize the tradeoff between quality and quantity of the interactomes, are also  
234 improved over random for increasingly stringent co-fractionation-specific gold standard subsets (Fig  
235 5D-G).

236  
237

238 **Fig 5. Using technique-specific gold standard subsets increases interactome size and/or**  
239 **quality.** A. The size of interactomes produced by co-elution gold standard subsets of varying  
240 stringency (black) or randomly selected subsets of the same size as the co-elution specific subsets  
241 (red, 95% CI). Interactomes have 50% precision. B. 75% precision. C. 90% precision. D. Precision-  
242 recall curve for the interactome predicted using the entire gold standard set of interactions. E.  
243 Precision-recall curve predicted using the gold standard complexes that satisfied the  $10^{-2}$  threshold.  
244 F.  $10^{-6}$  threshold. G.  $10^{-10}$  threshold. Precision-recall curves using random subsets of the same size  
245 are shown in red (95% CI).

246  
247

248

## 249 Discussion

250 Here we have estimated the discrepancies between interactome data generated by co-fractionation  
251 and curated gold standard interactions from the CORUM database. Across 20 datasets, 37%

252 (54859/149477) of gold standard protein pairs display at most weak evidence for interaction ( $R <$   
253  $0.25$ , Pearson correlation), and 23% (34442/149477) show no evidence of interaction ( $R < 0$ ) (Fig 1D,  
254 Fig 2). Other databases have a larger proportion of anti-correlated interactions, with up to 55% of  
255 database PPIs showing no evidence for interaction (Fig 2). Protein interaction networks have been  
256 compared elsewhere. For example, comparing the power of five PPI networks to predict cancer  
257 genes (28), benchmarking 21 networks for their ability to predict disease genes (29), and  
258 investigating their impact on recovering novel PPIs from high-throughput data (30). However, to our  
259 knowledge our study is the first to specifically address the conditional nature of PPI entries in these  
260 databases.

261  
262 Since CORUM is manually curated from low-throughput experiments, we do not interpret these anti-  
263 correlated pairs as errors in the database. Rather, we attribute any discrepancy between our raw data  
264 and the databases to the conditional nature of protein interactions and the fact that databases  
265 compile evidence from many different experiments and conditions. Indeed, under certain conditions,  
266 60S ribosomal proteins, which have been extensively studied and shown to interact, display poor  
267 evidence of interaction (Supp. Fig 1).

268  
269 Therefore studies should take care not to conflate interaction databases, which attempt to list all  
270 interactions that *can* interact, with the subset of interactions that are in fact interacting in a given  
271 experiment. Doing so limits high-throughput interactome mapping studies. First, it artificially raises all  
272 estimates of error rates, since by definition a portion of the reference positive set is indistinguishable  
273 from the negative set. Second, when gold standard interactions are used as training labels in a  
274 classifier (2,3,7,11), classification accuracy will be reduced and fewer interactions and/or more noisy  
275 interactions will be predicted.

276  
277 One solution is to use condition- or technique-specific gold standard subsets. We show that subsets  
278 of gold standard databases that have consistent, independent evidence taken from similar conditions  
279 to those under which the raw data was produced can increase the size of interactomes judged at the  
280 same precision level (Fig 4). We include this set of CORUM gold standard complexes and  
281 recommend it for future co-fractionation studies.

282  
283

## 284 **Methods**

### 285 **4.1 Gold standards databases**

286 We primarily used CORUM core complexes as an LC database of known protein complexes  
287 (Comprehensive Resource of Mammalian protein complexes, released February 2017) (31). CORUM  
288 is based entirely on experimentally verified interactions, all of which must have extensive low-  
289 throughput supporting data. To provide a broad sample of databases, we also analyzed interactions  
290 from an additional ten LC interaction databases: HPRD (release 9, last modified April 13, 2010) (16),  
291 MINT (downloaded June 8, 2017) (17), MENTHA (release June 5, 2017) (18), BIND (release 1.0, last  
292 modified May 20, 2014) (19), HIPPIE (release 2.0, last modified June 24, 2016) (20), IID (release  
293 April 2017) (21), BioGrid (release 3.4.149, accessed June 8, 2017) (32), PINA (version 2, last  
294 updated May 21, 2014) (22), HINT (version 4, downloaded June 8, 2017) (23), and DIP (release  
295 February 5, 2017) (24). We analyzed a subset of the full BioGrid database for which interactions were  
296 supported by at least two publications ( $N_{\text{full}} = 254886$  interactions,  $N_{\text{subset}} = 39524$ ). For databases  
297 such as CORUM that list complexes rather than pairwise interactions, gold standard interactions were  
298 defined as all protein pairs that are co-members of at least one gold standard complex. Only non-  
299 redundant, i.e. unique protein interactions were analyzed.

300

## 301 **4.2 Co-fractionation profile datasets and mass spectrometry**

302 The majority of co-fractionation data analyzed in this study was collected by our group and constitutes  
303 a broad sampling of SILAC-labelled co-fractionation datasets. Data was collected for four  
304 independent experiments, each mapping interactome rearrangements to an experimental treatment.  
305 Datasets in this study were separated by condition and replicate, such that an experiment with two  
306 conditions and three replicates would yield six datasets analyzed here. A total of 20 datasets are  
307 included in this study. Three experiments are previously published: two that map the reorganization of  
308 the HeLa interactome in response to stimulation with EGF (5) and *Salmonella enterica* infection (6),  
309 and one that maps the response of Jurkat T cells to Fas-mediated apoptosis (7). All fractionation was  
310 achieved by size exclusion chromatography except (7) which used blue-native page. Both methods  
311 separate protein complexes by molecular weight. The third co-fractionation dataset is available in this  
312 manuscript (Supp. Table 2). All co-fractionation data was quantified using SILAC ratios over  
313 successive fractions of a separation gradient, i.e. a chromatogram. Only protein chromatograms with  
314 quantification in five or more fractions were analyzed. In order to compare interactions seen by  
315 different fractionation techniques, we also analyzed previously published co-fractionation data  
316 generated by extensive biochemical fractionation (2). All co-fractionation profile datasets are  
317 composed of co-fractionation profiles, which are protein amount measured over successive fractions,  
318 quantified by mass spectrometry. There is one profile per protein or protein group for each  
319 combination of replicate and condition.

320

## 321 **4.3 Published PPI interactomes**

322 In addition to raw co-fractionation data, we analyzed twelve published human protein interactomes:  
323 three derived from co-fractionation data published by our lab (CF1 (7), CF2 (5), CF3 (6)), three  
324 derived from co-fractionation data not published by us (CF4 (3), CF5 (2), CF6 (4)), three AP-MS  
325 derived interactomes (AP1 (9), AP2 (10), AP3 (25)), and three Y2H interactomes (Y2H1 (12), Y2H2  
326 (33), Y2H3 (34)). All interactomes were high-throughput and represent a broad sampling of the full  
327 human interactome.

328

## 329 **4.4 Evaluating gold standard complexes**

330 *Raw co-fractionation profiles:* To evaluate the degree to which gold standard PPIs are supported by  
331 co-fractionation data, we calculated the Pearson correlation coefficient and Euclidean distance  
332 between each pair of chromatograms in a dataset. For both measures, missing values in the  
333 chromatograms were replaced by zeros. When calculating Euclidean distance, all chromatograms  
334 were normalized to have a minimum value of 0 and a maximum value of 1. High correlation or low  
335 Euclidean distance was taken as evidence that the gold standard interaction was interacting in the  
336 sample.

337

338 *Published interactomes:* We mapped published pairwise protein-protein interactions to gold standard  
339 CORUM complexes. For each published interactome, we tested whether gold standard complexes  
340 were enriched for published interactions, meaning they contained significantly more pairwise  
341 interactions between complex members than the average rate (hypergeometric test). We took  
342 significant enrichment as evidence that the published interactome supported the gold standard  
343 complex. To standardize interactomes with each other and CORUM, all isoform tags were removed  
344 from protein IDs.

345

346 To control for expression and different baits, we also defined the subset of gold standard complexes  
347 in each study in which at least one interaction could be predicted. For CF interactomes this was



348 defined as a complex in which at least two co-complex members are present in the raw data (raw  
349 data for (3) downloaded here <http://metazoa.med.utoronto.ca/>; (4) and (2) raw data taken from  
350 publication). For AP-MS interactomes we assumed the matrix model, meaning that a bait protein  
351 need not be present in a gold standard complex for an interaction to be predicted in the gold standard  
352 complex, as long as a gold standard complex member is associated with a bait protein. Therefore if at  
353 least two members of the gold standard complex were present in the AP-MS interactome, we defined  
354 that gold standard complex as a complex that could be predicted by the study. Finally, for Y2H  
355 interactomes we defined a gold standard complex as able to be predicted if at least one complex  
356 member was a bait protein.

357

#### 358 **4.5 Co-fractionation-specific gold standard subsets**

359 In this study, we used subsets of the gold standard complexes that are consistently supported by co-  
360 fractionation interactomes. For these co-fractionation subsets, we used all CORUM complexes that  
361 were significantly enriched for interactions (hypergeometric test) in CF4, CF5, and CF6. Significance  
362 was assessed at a range of p-value thresholds: 1,  $10^{-2}$ ,  $10^{-6}$  and  $10^{-10}$ . A threshold of  $p = 1$  produced  
363 the subset of CORUM complexes with at least one interaction in CF4, CF5, and CF6. The number of  
364 CORUM complexes (interactions) in each subset were 302 (33378), 122 (10953), 95 (6326) and 80  
365 (4861), respectively.

366

367 To control for the effects of simply reducing the size of the gold standards, we generated random  
368 subsets of gold standard PPIs with the same size as the selected subsets. Of the full 46413 unique  
369 PPIs in the core CORUM complexes, we randomly sampled 33378, 10953, 6326, and 4861 PPIs  
370 without replacement. Random sampling was repeated 100 times for each of the subset sizes, and  
371 interactomes were predicted using each random subset with the PrInCE software package.

372

#### 373 **4.6 Interactome prediction**

374 For this study, interactomes were predicted using the PrInCE software (Predicting Interactomes via  
375 Co-Elution), a software package developed by our lab for the analysis of co-fractionation datasets  
376 (11). PrInCE measures the similarity between every pair of co-fractionation profiles using a variety of  
377 similarity measures, such as Pearson correlation and Euclidean distance. Gold standard interactions  
378 are used as true positive labels (TP) in a Naive Bayes classifier. False positive interactions (FP) are  
379 defined as interactions between a pair of proteins that both occur in the gold standard database, but  
380 are not members of the same gold standard complex, e.g. an interaction between a ribosomal protein  
381 and a proteasomal protein. PrInCE assesses the quality of the predicted interactome using precision,  
382 where precision =  $TP/(TP + FP)$ .

383

384

### 385 **Acknowledgements**

386 We thank N. Brown, C. Kerr, A. McAfee, and A. Nastasa for critical suggestions. M.A.S. is supported  
387 by a CIHR Frederick Banting and Charles Best Canada Graduate Scholarship, a UBC Four Year  
388 Fellowship, and a Vancouver Coastal Health-CIHR-UBC MD/PhD Studentship Award.

389

390

391

### 392 **References**

- 393 1. Kristensen AR, Foster LJ. High throughput strategies for probing the different organizational levels of  
394 protein interaction networks. *Mol Biosyst.* 2013 Sep;9(9):2201–12.

- 395 2. Havugimana PC, Hart GT, Nepusz T, Yang H, Turinsky AL, Li Z, et al. A census of human soluble  
396 protein complexes. *Cell*. 2012 Aug 31;150(5):1068–81.
- 397 3. Wan C, Borgeson B, Phanse S, Tu F, Drew K, Clark G, et al. Panorama of ancient metazoan  
398 macromolecular complexes. *Nature*. 2015 Sep 17;525(7569):339–44.
- 399 4. Kirkwood KJ, Ahmad Y, Larance M, Lamond AI. Characterization of native protein complexes and  
400 protein isoform variation using size-fractionation-based quantitative proteomics. *Mol Cell Proteomics*.  
401 2013 Dec;12(12):3851–73.
- 402 5. Kristensen AR, Gsponer J, Foster LJ. A high-throughput approach for measuring temporal changes  
403 in the interactome. *Nat Methods*. 2012 Sep;9(9):907–9.
- 404 6. Scott NE, Brown LM, Kristensen AR, Foster LJ. Development of a computational framework for the  
405 analysis of protein correlation profiling and spatial proteomics experiments. *J Proteomics*. 2015 Apr  
406 6;118:112–29.
- 407 7. Scott NE, Rogers LD, Prudova A, Brown NF, Fortelny N, Overall CM, et al. Interactome disassembly  
408 during apoptosis occurs independent of caspase cleavage. *Mol Syst Biol*. 2017 Jan 12;13(1):906.
- 409 8. Heide H, Bleier L, Steger M, Ackermann J, Dröse S, Schwamb B, et al. Complexome profiling  
410 identifies TMEM126B as a component of the mitochondrial complex I assembly complex. *Cell Metab*.  
411 2012 Oct 3;16(4):538–49.
- 412 9. Huttlin EL, Ting L, Bruckner RJ, Gebreab F, Gygi MP, Szpyt J, et al. The BioPlex Network: A  
413 Systematic Exploration of the Human Interactome. *Cell*. 2015 Jul 16;162(2):425–40.
- 414 10. Hein MY, Hubner NC, Poser I, Cox J, Nagaraj N, Toyoda Y, et al. A human interactome in three  
415 quantitative dimensions organized by stoichiometries and abundances. *Cell*. 2015 Oct  
416 22;163(3):712–23.
- 417 11. Stacey RG, Skinnider MA, Scott NE, Foster LJ. A rapid and accurate approach for prediction of  
418 interactomes from co-elution data (PrInCE). *BMC Bioinformatics*. 2017 Oct 23;18(1):457.
- 419 12. Rolland T, Taşan M, Charloteaux B, Pevzner SJ, Zhong Q, Sahni N, et al. A proteome-scale map of  
420 the human interactome network. *Cell*. 2014 Nov 20;159(5):1212–26.
- 421 13. Celaj A, Schlecht U, Smith JD, Xu W, Suresh S, Miranda M, et al. Quantitative analysis of protein  
422 interaction network dynamics in yeast. *Mol Syst Biol*. 2017 Jul 13;13(7):934.
- 423 14. Ruepp A, Brauner B, Dunger-Kaltenbach I, Frishman G, Montrone C, Stransky M, et al. CORUM: the  
424 comprehensive resource of mammalian protein complexes. *Nucleic Acids Res*. 2008  
425 Jan;36(Database issue):D646–50.
- 426 15. Wysocka J, Myers MP, Laherty CD, Eisenman RN, Herr W. Human Sin3 deacetylase and trithorax-  
427 related Set1/Ash2 histone H3-K4 methyltransferase are tethered together selectively by the cell-  
428 proliferation factor HCF-1. *Genes Dev*. 2003 Apr 1;17(7):896–911.
- 429 16. Peri S, Navarro JD, Amanchy R, Kristiansen TZ, Jonnalagadda CK, Surendranath V, et al.  
430 Development of human protein reference database as an initial platform for approaching systems  
431 biology in humans. *Genome Res*. 2003 Oct;13(10):2363–71.
- 432 17. Chatr-aryamontri A, Ceol A, Palazzi LM, Nardelli G, Schneider MV, Castagnoli L, et al. MINT: the  
433 Molecular INTERaction database. *Nucleic Acids Res*. 2007;35(Database):D572–4.
- 434 18. Calderone A, Castagnoli L, Cesareni G. mentha: a resource for browsing integrated protein-  
435 interaction networks. *Nat Methods*. 2013;10(8):690–1.

- 436 19. Bader GD, Betel D, Hogue CWV. BIND: the Biomolecular Interaction Network Database. *Nucleic*  
437 *Acids Res.* 2003 Jan 1;31(1):248–50.
- 438 20. Alanis-Lobato G, Andrade-Navarro MA, Schaefer MH. HIPPIE v2.0: enhancing meaningfulness and  
439 reliability of protein–protein interaction networks. *Nucleic Acids Res.* 2016;45(D1):D408–14.
- 440 21. Kotlyar M, Pastrello C, Sheahan N, Jurisica I. Integrated interactions database: tissue-specific view of  
441 the human and model organism interactomes. *Nucleic Acids Res.* 2016 Jan 4;44(D1):D536–41.
- 442 22. Cowley MJ, Pinese M, Kassahn KS, Waddell N, Pearson JV, Grimmond SM, et al. PINA v2.0: mining  
443 interactome modules. *Nucleic Acids Res.* 2011;40(D1):D862–5.
- 444 23. Das J, Yu H. HINT: High-quality protein interactomes and their applications in understanding human  
445 disease. *BMC Syst Biol.* 2012 Jul 30;6:92.
- 446 24. Xenarios I. DIP: the Database of Interacting Proteins. *Nucleic Acids Res.* 2000;28(1):289–91.
- 447 25. Ewing RM, Chu P, Elisma F, Li H, Taylor P, Climie S, et al. Large-scale mapping of human protein-  
448 protein interactions by mass spectrometry. *Mol Syst Biol.* 2007 Mar 13;3:89.
- 449 26. GTEx Consortium. The Genotype-Tissue Expression (GTEx) project. *Nat Genet.* 2013  
450 Jun;45(6):580–5.
- 451 27. Kim M-S, Pinto SM, Getnet D, Nirujogi RS, Manda SS, Chaerkady R, et al. A draft map of the human  
452 proteome. *Nature.* 2014 May 29;509(7502):575–81.
- 453 28. Li Y, Sahni N, Yi S. Comparative analysis of protein interactome networks prioritizes candidate genes  
454 with cancer signatures. *Oncotarget.* 2016 Nov 29;7(48):78841–9.
- 455 29. Huang JK, Carlin DE, Yu MK, Zhang W, Kreisberg JF, Tamayo P, et al. Systematic Evaluation of  
456 Molecular Networks for Discovery of Disease Genes. *Cell Syst.* 2018 Apr 25;6(4):484–95.e5.
- 457 30. Skinnider MA, Stacey RG, Foster LJ. Genomic data integration systematically biases interactome  
458 mapping. Submitted.
- 459 31. Ruepp A, Waegelé B, Lechner M, Brauner B, Dunger-Kaltenbach I, Fobo G, et al. CORUM: the  
460 comprehensive resource of mammalian protein complexes—2009. *Nucleic Acids Res.*  
461 2009;38(suppl\_1):D497–501.
- 462 32. Chatr-Aryamontri A, Breitkreutz B-J, Oughtred R, Boucher L, Heinicke S, Chen D, et al. The BioGRID  
463 interaction database: 2015 update. *Nucleic Acids Res.* 2015 Jan;43(Database issue):D470–8.
- 464 33. Wang J, Huo K, Ma L, Tang L, Li D, Huang X, et al. Toward an understanding of the protein  
465 interaction network of the human liver. *Mol Syst Biol.* 2011 Oct 11;7:536.
- 466 34. Rual J-F, Venkatesan K, Hao T, Hirozane-Kishikawa T, Dricot A, Li N, et al. Towards a proteome-  
467 scale map of the human protein-protein interaction network. *Nature.* 2005 Oct 20;437(7062):1173–8.

468  
469

## 470 Supporting information

471

472 **S1 Fig. Restricting gold standard PPIs to those supported by two or more publications does**  
473 **not eliminate uncorrelated protein pairs, as measured by Pearson correlation  $R < 0$ .** Each point  
474 is one dataset. Horizontal lines show medians. Red: all non-gold standard protein pairs. Black: non-  
475 redundant gold standard pairs. “All pairs” and “BioGrid” correspond to Figure 1.

476

477 **S2 Fig. 60S ribosome co-fractionates via sucrose fractionation (A) but not via heparin dual ion**  
478 **exchange (B).** Pearson R. Plots show replicates. Missing (black) are protein pairs where neither  
479 protein was detected.

480

481 **S1 Table. Some CORUM complexes are predicted by a single high-throughput technique, as**  
482 **measured by average complex coverage.** Complex coverage = number of pairwise interactions in a  
483 published interactome / total pairwise connections within a complex. Parentheses show number of  
484 complexes averaged. CF-specific complexes correspond to numbers 1-80 in Figure 3D, AP/MS-  
485 specific to 81-102, and Y2H-specific to 103-163. To control for expression and bait selection, only  
486 complexes that could be predicted in each interactome are included (see Methods).

487

488 **S2 Table. Third co-fractionation dataset.**

489

490

491

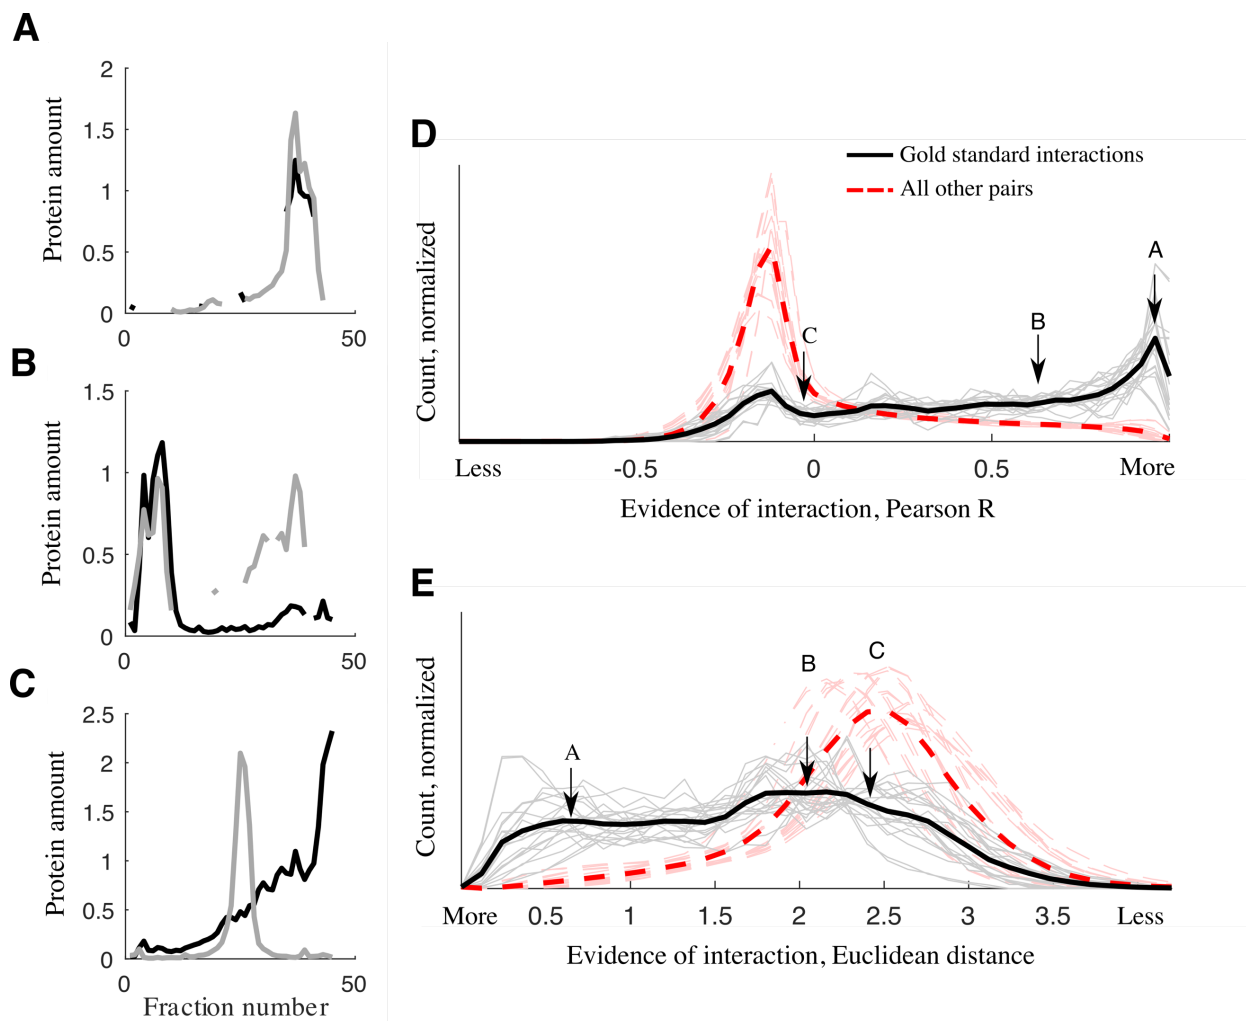

492

493

494

Fig 1.

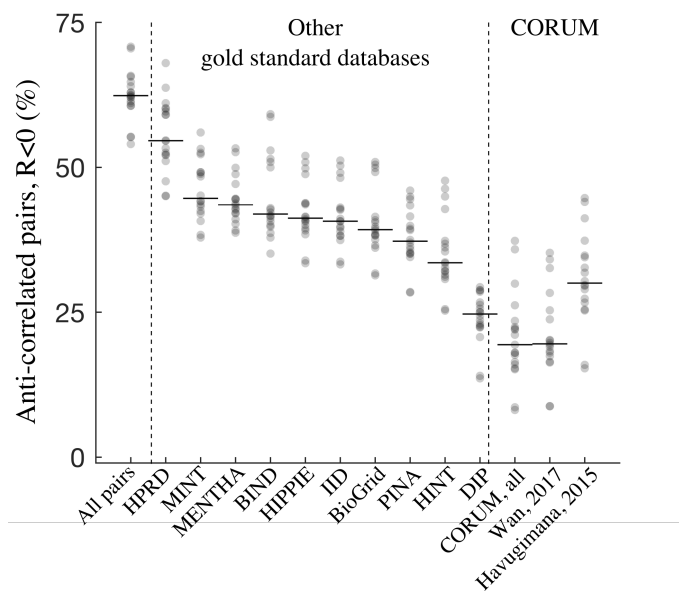

495  
496

**Fig 2.**

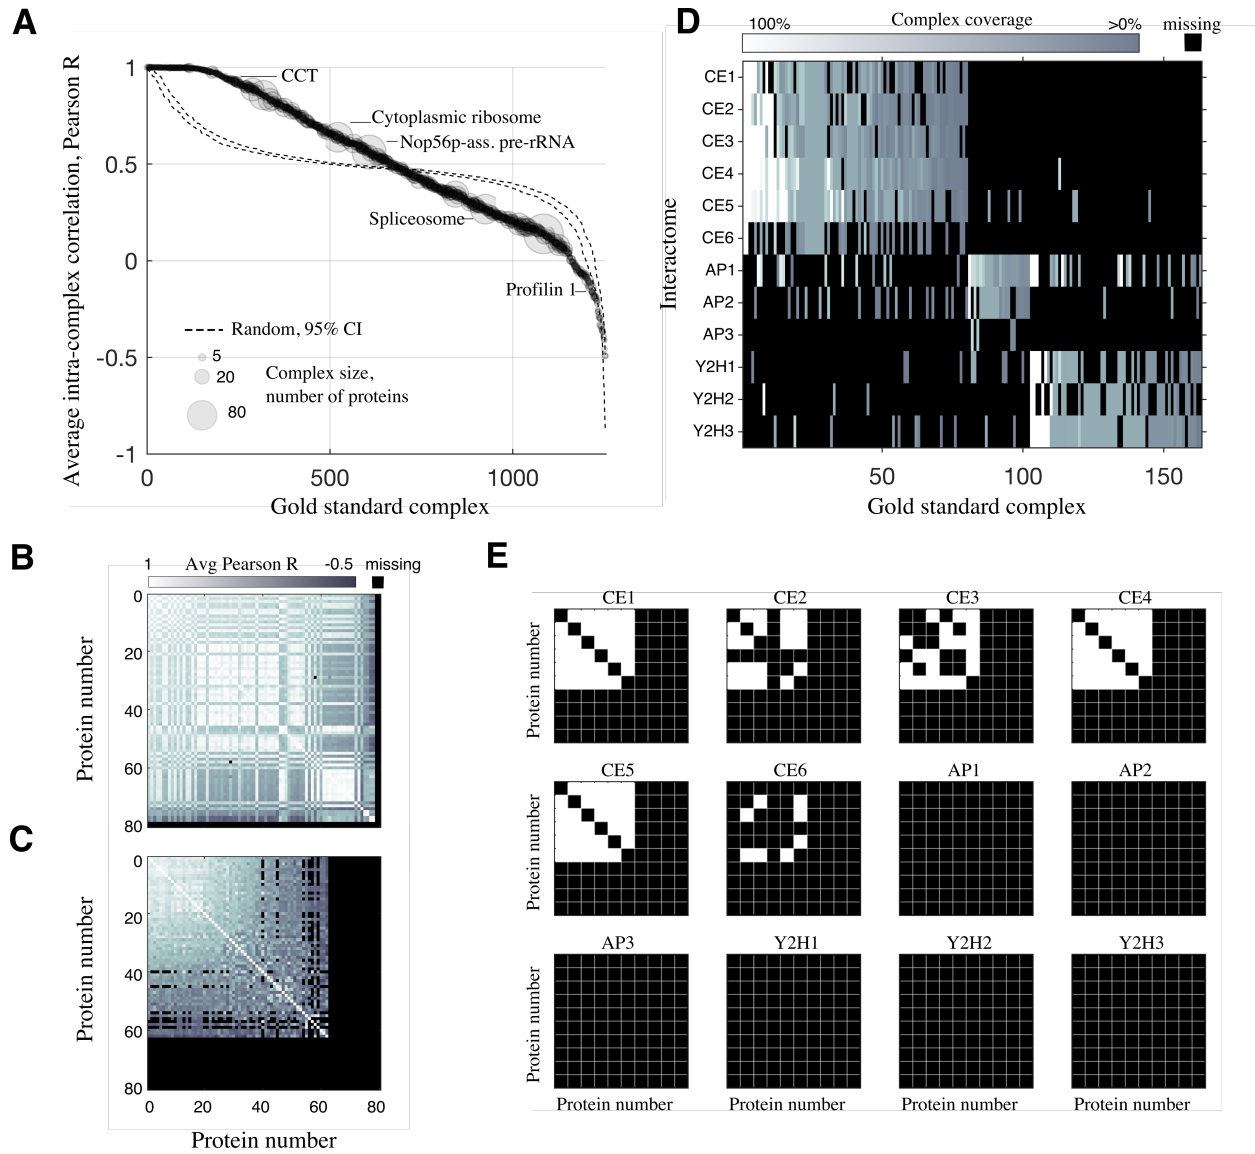

**Fig 3.**

497  
498  
499

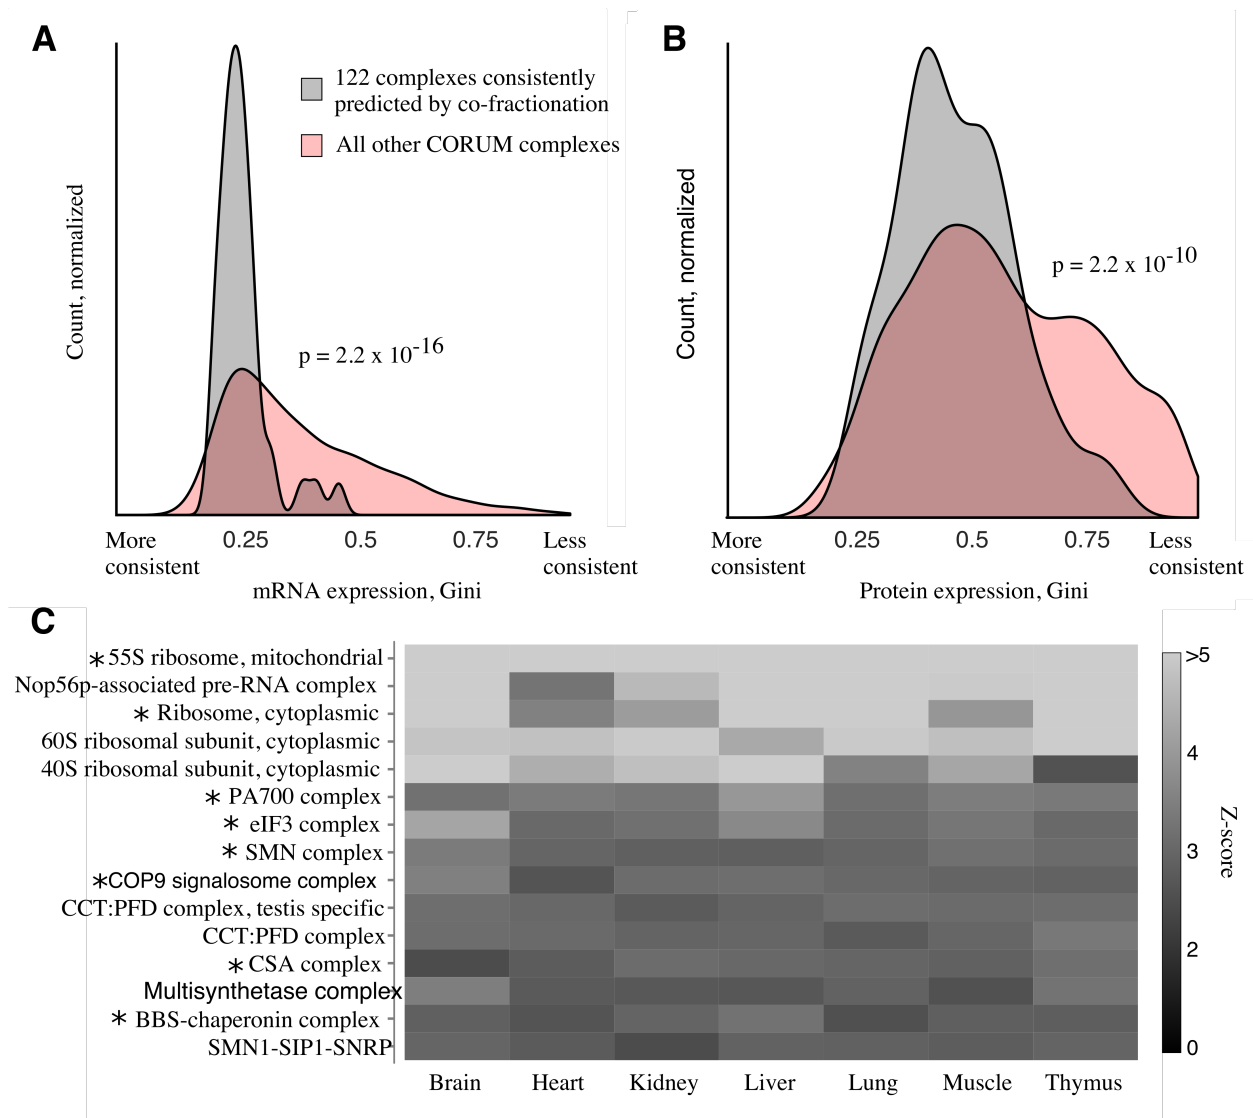

500  
 501  
 502

**Fig 4.**



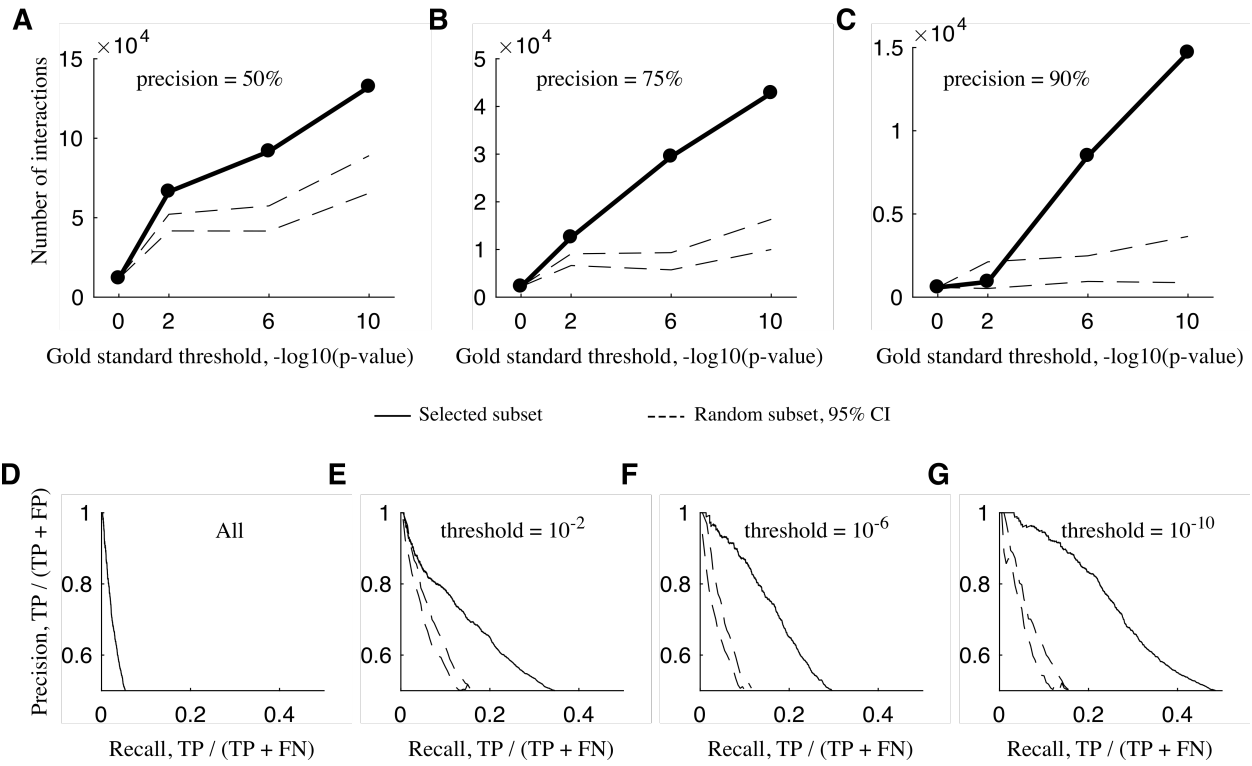

503  
504

Fig 5.
